# Supplementary material
Source: Preprints.org preprint supplement (doi:10.20944/preprints202007.0145.v1)
Supplement: Supplementary file 1 [file supplementary]

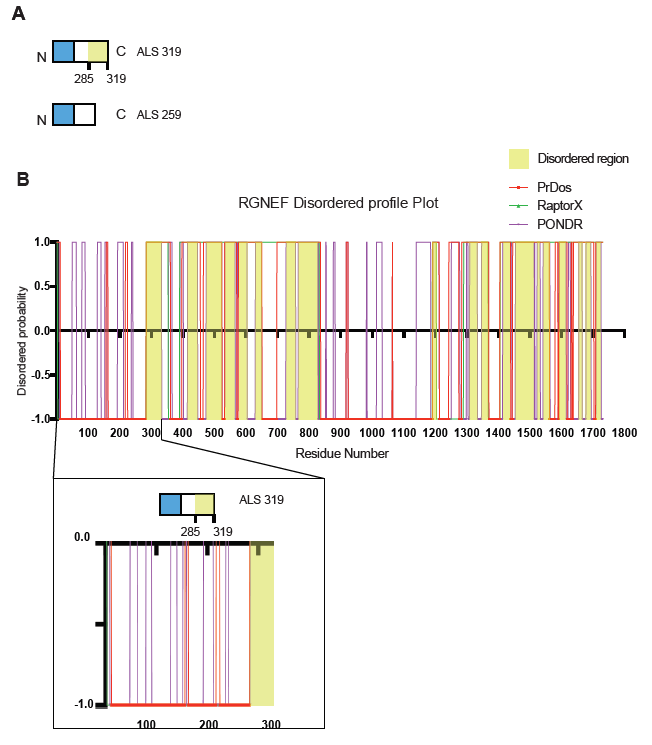


**Supplementary Figure 1. A** ALS truncated products illustration showing that the longer variant contains a domain predicted to be intrinsically disordered. **B** RGNEF disordered profile plot shows the prediction of intrinsically disordered regions within the RGNEF protein as predicted by three independent algorithms (PrDos, RaptorX, PONDR). Areas highlighted in yellow show intrinsically disordered residues predicted by all three algorithms. ALS 319 contains intrinsically disordered residues starting from 285 – 319.
